# Supplementary material for: Efficient Therapeutic Function and Mechanisms of Human Polyclonal CD8+CD103+Foxp3+Regulatory T Cells on Collagen-Induced Arthritis in Mice
Source: Hindawi journal article supplement (doi:10.1155/2019/8575407), 2019-02-19

**Supplementary Figure1 (S1, FACS representative data for Figure2A)**

S1-for Fig 2A

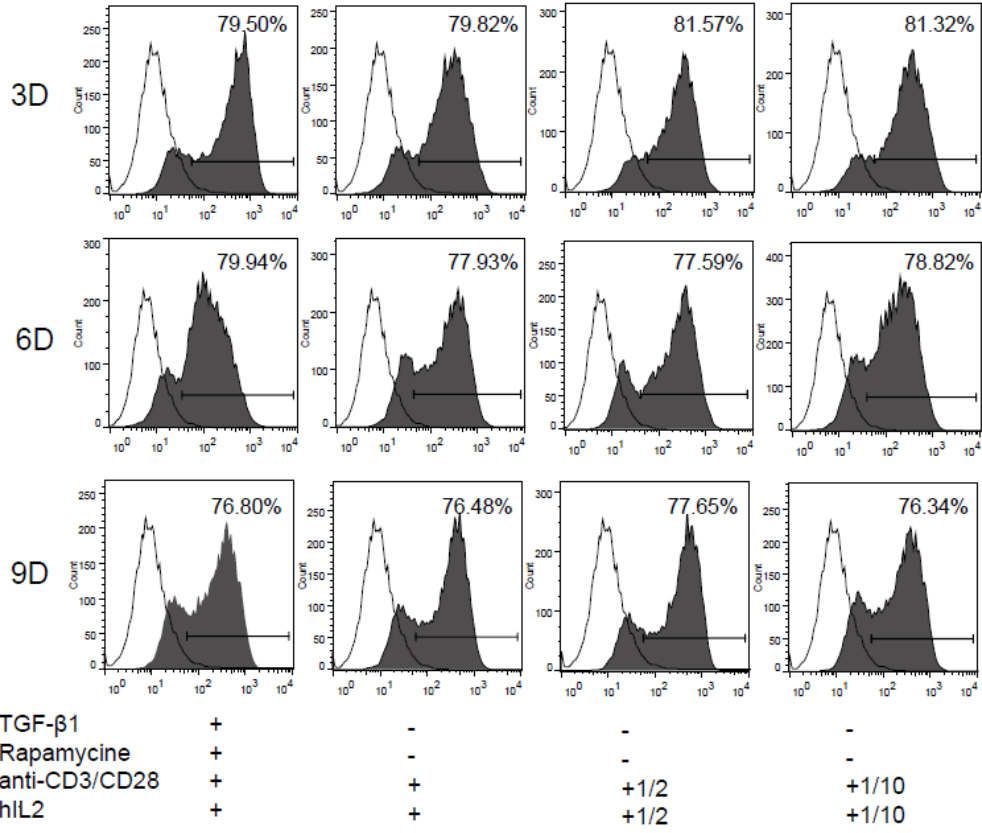

**Supplementary Figure2 (S2, FACS representative data for Figure2B)**

S2-for Fig2B

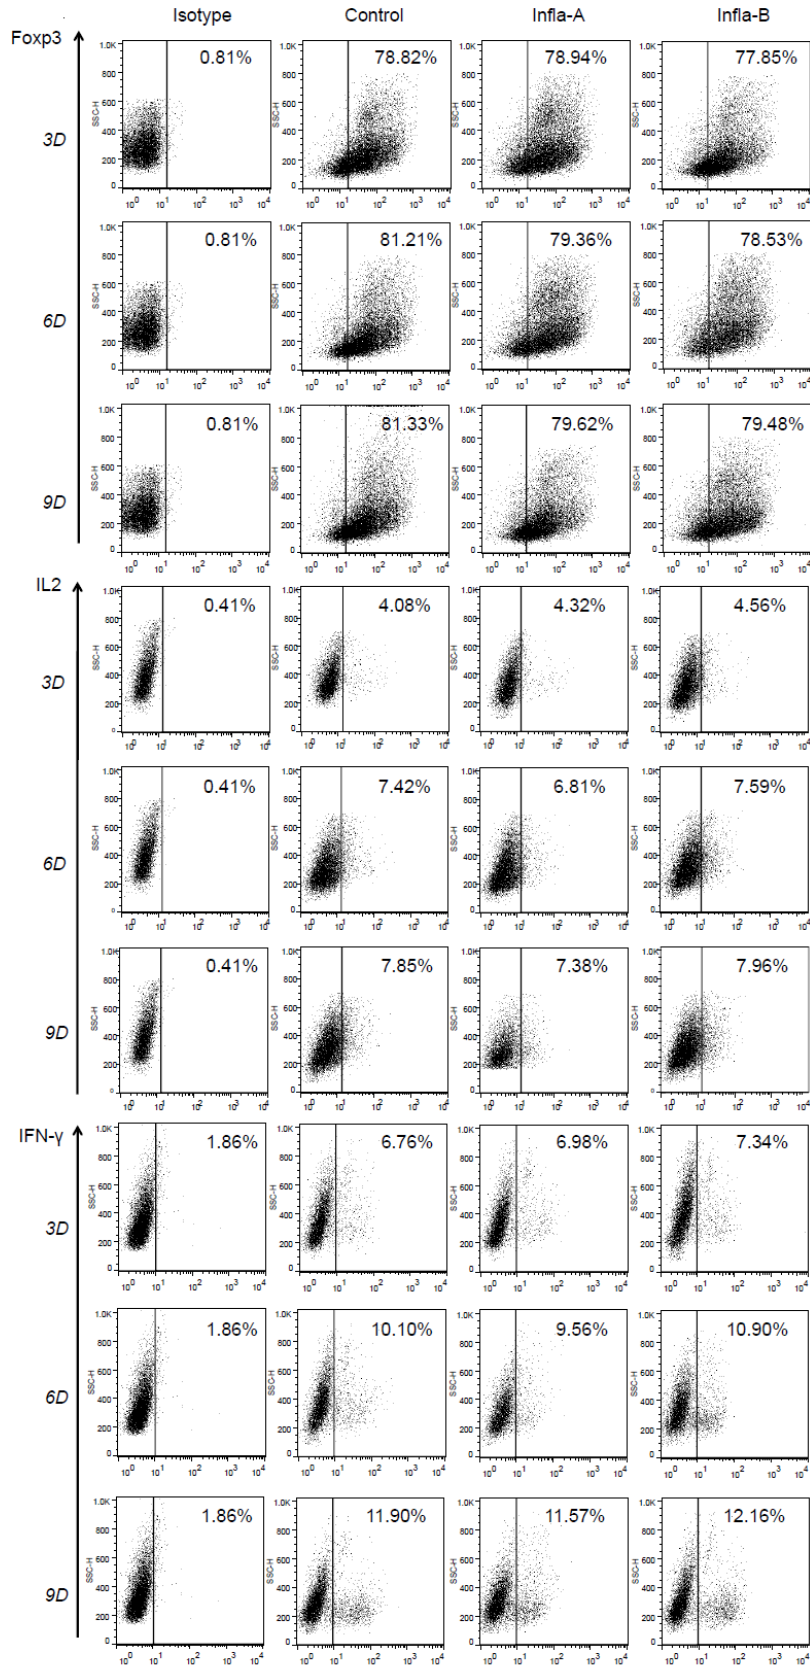

Supplement: f1 [file 8575407.f1.pdf]
